# Supplementary material for: Assembly of D1/D2 complexes of photosystem II: Binding of pigments and a network of auxiliary proteins
Source: PubMed Central journal article supplement — Plant Physiol. 2022 Feb 3;189(2):790–804. doi: 10.1093/plphys/kiac045 (PMC9157124; doi:10.1093/plphys/kiac045), 2022-02-03
Supplement: kiac045_supplementary_data.pdf [file kiac045_supplementary_data.pdf]

## **Assembly of D1/D2 complexes of photosystem II: binding of pigments and a network of auxiliary proteins**

Jana Knoppová, Roman Sobotka, Jianfeng Yu, Martina Bečková, Jan Pílný, Joko P. Trinugroho, Ladislav Csefalvay, David Bína, Peter J. Nixon, and Josef Komenda<sup>1</sup>

<sup>1</sup>To whom correspondence should be addressed. E-mail: komenda@alga.cz

### **SUPPLEMENTAL MATERIAL**

#### **Supplemental figures**

Supplemental Figure S1. 2D protein analysis of membranes isolated from the CP47-less mutant expressing a native or a His-tagged variant of the D2 protein ( $\Delta$ CP47 and His-D2/ $\Delta$ CP47, respectively).

Supplemental Figure S2. 2D protein analysis of the FLAG-Ycf39 preparation isolated from the CP47-null mutant expressing FLAG-Ycf39.

Supplemental Figure S3. 2D protein analysis of the preparation isolated from the CP47-less strain expressing His-tagged D2 protein and lacking Ycf39 (His-D2/ $\Delta$ CP47/ $\Delta$ Ycf39).

Supplemental Figure S4. 2D protein analysis of the membranes isolated from the CP47-less strain ( $\Delta$ CP47) after the radioactive pulse-labeling (p) followed by 30 and 60 min of the pulse-chase (pch).

Supplemental Figure S5. 2D protein analysis of the preparation isolated from the CP47-less strain expressing His-tagged D2 protein.

Supplemental Figure S6. 2D protein analysis of the preparation isolated from the CP47-less strain expressing FLAG-tagged PsbI protein using FLAG-specific affinity chromatography.

Supplemental Figure S7. 2D protein analysis of the control preparation isolated by Ni-affinity chromatography from the control CP47-less strain.

Supplemental Figure S8. 2D protein analysis of FLAG-D2 and the control preparation.

Supplemental Figure S9. Separation of RCII complexes by ionex chromatography and their absorption spectra.

Supplemental Figure S10. Room temperature absorption spectra and 77K chlorophyll fluorescence spectra of the FLAG-D2 and control FLAG-free preparations.

Supplemental Figure S11. 2D protein analysis of radioactively labeled membrane proteins of  $\Delta$ CP47 and  $\Delta$ CP47/ $\Delta$ Slr0575 strains.

Supplemental Figure S12. Native gel analysis of His-D2 preparations isolated from membranes of the CP47-less strain expressing His-D2 by using different concentrations of  $\beta$ -dodecyl-maltoside (DM) for solubilization.

Supplemental Figure S13. 2D protein analysis of the preparation isolated from the CP47-less strain lacking FtsH2 and expressing His-tagged D2 protein and the stoichiometry of pigment cofactors in RCII\* and RCIIa electrophoretically purified from this preparation.

Supplemental Figure S14. 2D protein analysis of membrane proteins of  $\Delta$ PSI/ $\Delta$ CP47/ $\Delta$ CP43 strain.

### **Supplemental tables**

Supplemental Table S1. List of PSII and PSI-related proteins identified by MS and Western blotting in the RCII complexes separated by 2D CN/SDS PAGE from the isolated His-D2/ $\Delta$ CP47 preparation (see Figure 1, arrows) and identification of Slr1470 in the His-D2/ $\Delta$ CP47 preparation (see Supplemental Figure S3).

Supplemental Table S2. List of the most abundant 40 proteins identified by MS in the FLAG-Psbl/ $\Delta$ CP47 preparation.

Supplemental Table S3. List of the most abundant 40 proteins identified by MS in the FLAG-D1 preparation.

Supplemental Table S4. List of the most abundant 40 proteins identified by MS in the FLAG-D2 preparation.

Supplemental Table S5. List of primers.

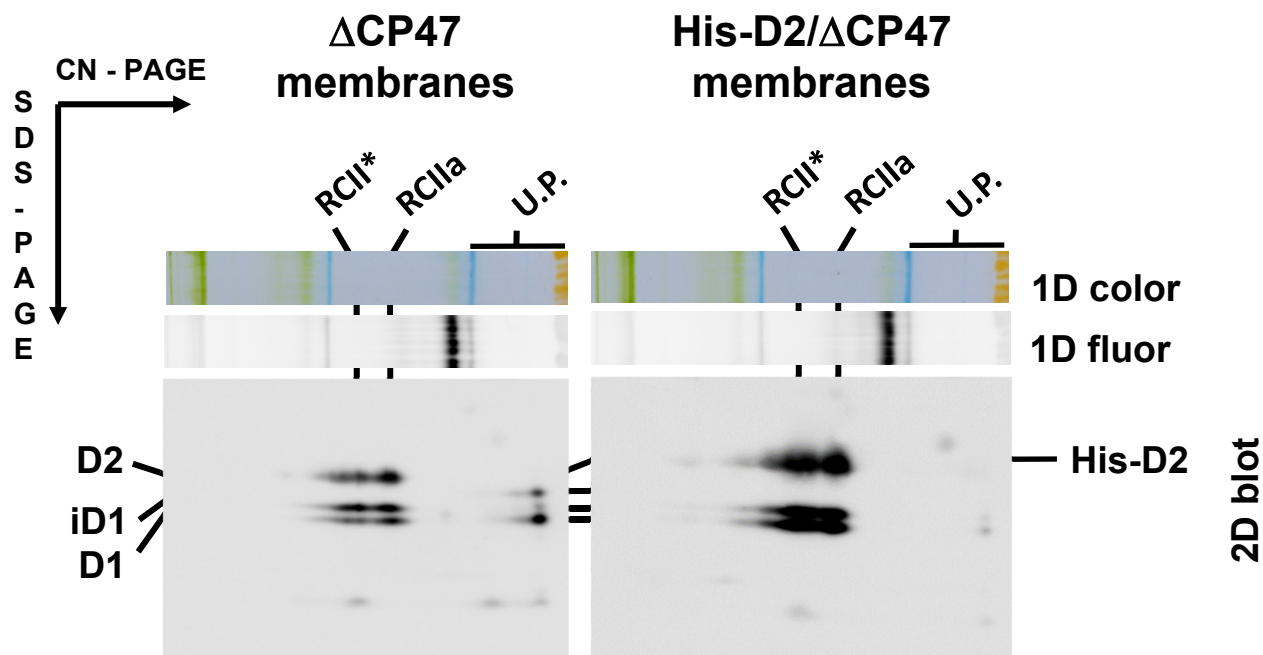

**Supplemental Figure S1. 2D protein analysis of membranes isolated from the CP47-less mutant expressing a native or a His-tagged variant of the D2 protein ( $\Delta$ CP47 and His-D2/ $\Delta$ CP47, respectively).** Membranes were analyzed by CN PAGE in the first dimension, the native gel was photographed (1D color) and scanned by LAS 4000 for fluorescence (1D fluor), after SDS-PAGE in the 2nd dimension the gel was electroblotted and sequentially probed with antibodies against D1 and D2 proteins. 4  $\mu$ g of Chl were loaded for each sample.

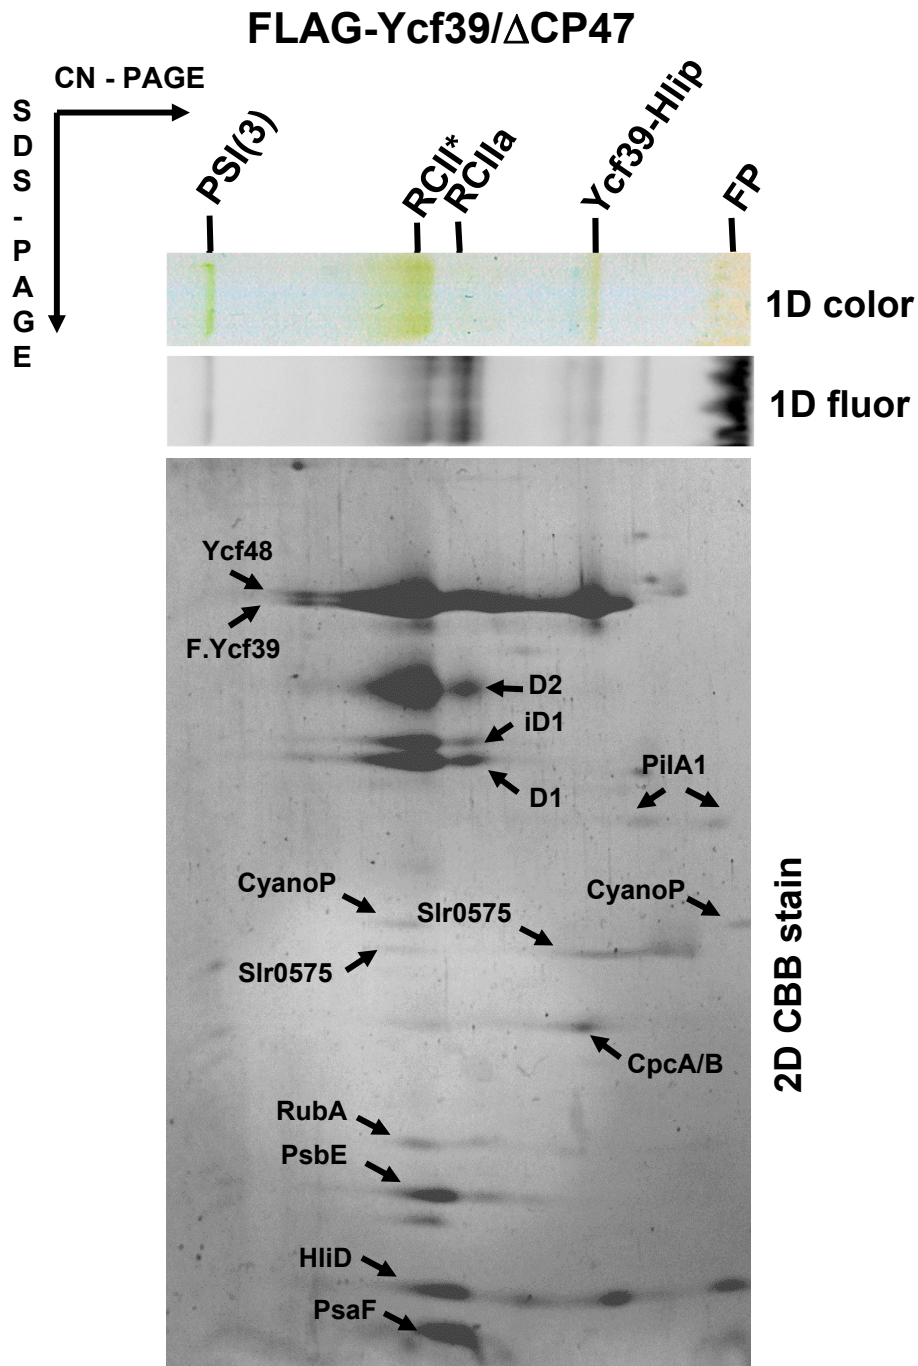

**Supplemental Figure S2. 2D protein analysis of the FLAG-Ycf39 preparation isolated from the CP47-null mutant expressing FLAG-Ycf39.** The preparation was isolated using anti-FLAG affinity resin and was subsequently analyzed by 2D CN/SDS-PAGE. The one dimension native gel was photographed (1D color) and scanned by LAS 4000 for Chl fluorescence (1D fluor). After the SDS-PAGE in the 2nd dimension the gel was stained by Coomassie blue (2D CBB stain) and the designated spots were identified by MS. FP are free pigments, other designation as in Figure 1. 0.5  $\mu$ g of Chl were loaded onto the gel.

## His-D2/ $\Delta$ CP47/ $\Delta$ Ycf39

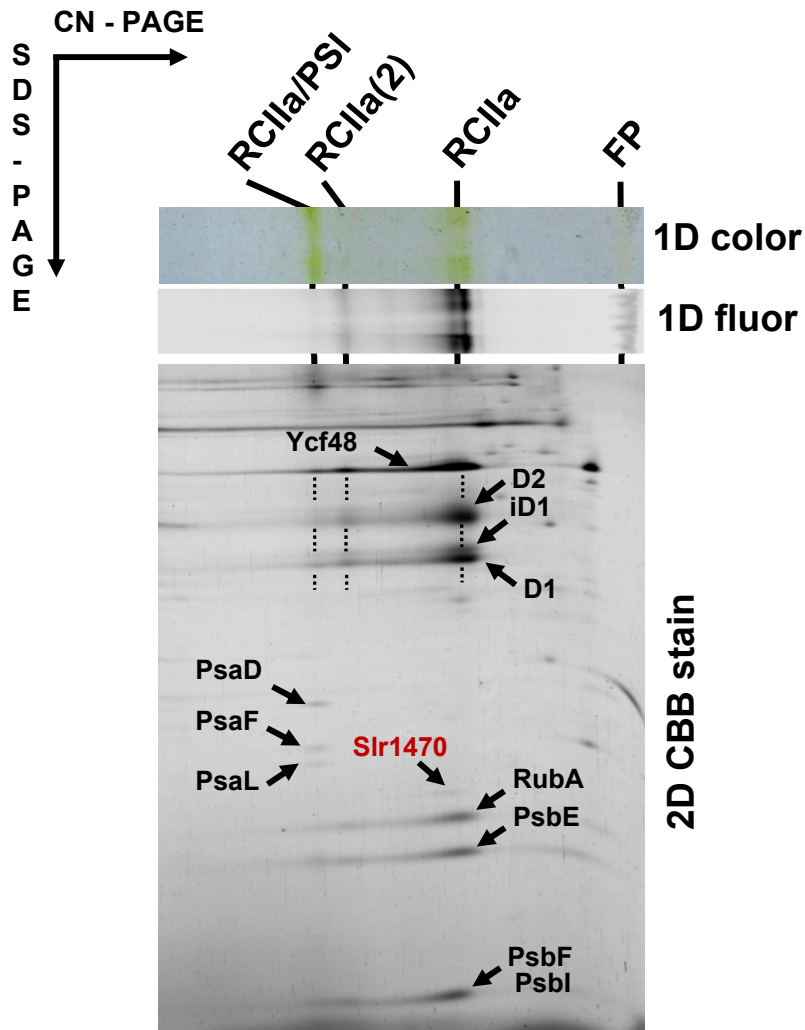

**Supplemental Figure S3. 2D protein analysis of the preparation isolated from the CP47-less strains expressing His-tagged D2 protein and lacking Ycf39 (His-D2/ $\Delta$ CP47/ $\Delta$ Ycf39).** The preparation isolated using Ni-affinity chromatography was analyzed by CN PAGE in the first dimension, the native gel was photographed (1D color) and scanned by LAS 4000 for fluorescence (1D fluor), after SDS-PAGE in the 2nd dimension the gel was stained by Coomassie Blue (2D CBB stain). Designation of the complexes as in Figures 1 and 2. Sir1470 was identified by MS (Table S1). 0.5  $\mu$ g of Chl were loaded onto the gel.

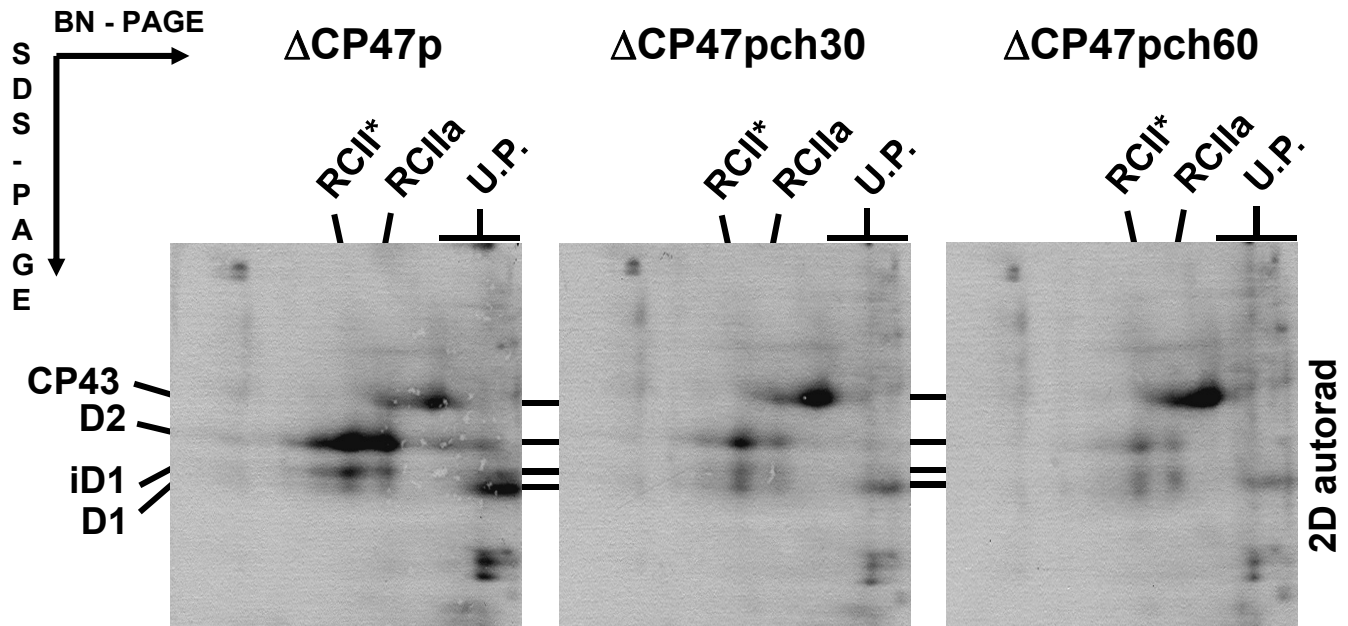

**Supplemental Figure S4. 2D protein analysis of the membranes isolated from the CP47-less strain ( $\Delta$ CP47) after the radioactive pulse-labeling (p) followed by 30 and 60 min of the pulse-chase (pch). Radioactively labeled membranes were analyzed by CN PAGE in the first dimension. After SDS-PAGE in the 2nd dimension the gel was stained by Coomassie Blue and exposed to a Phosphorimager plate (2D autorad). Designation of complexes as in Figures 1 and S1. 4  $\mu$ g of Chl were loaded onto the gel for each sample.**

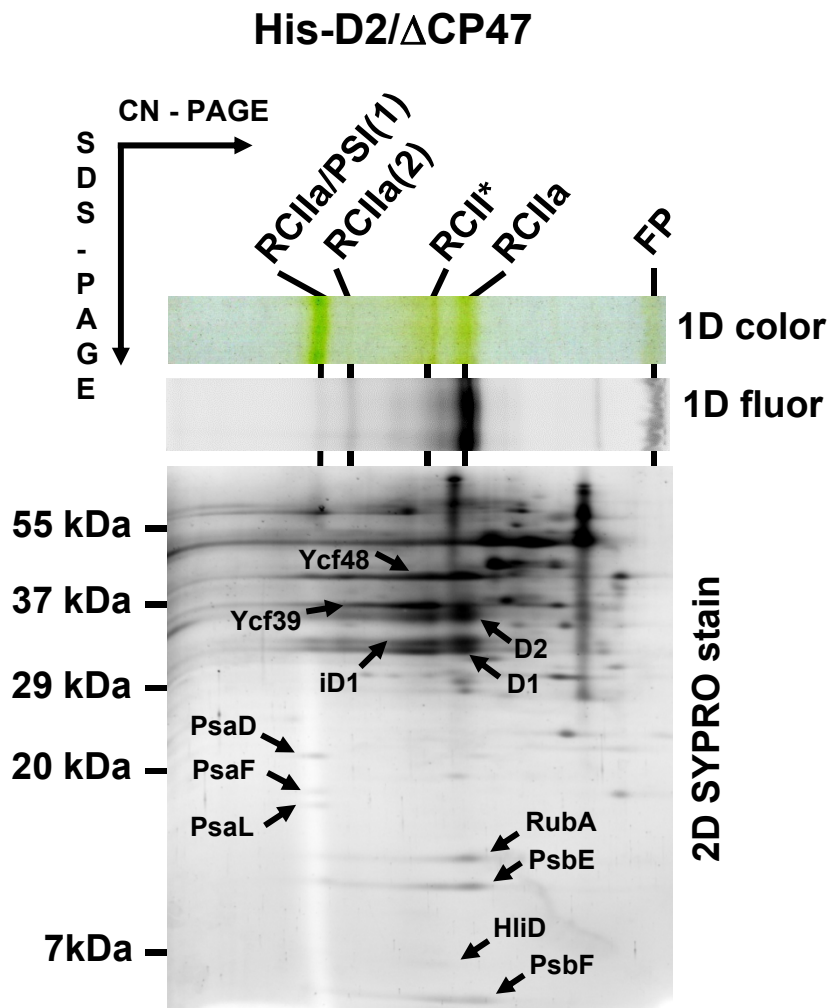

**Supplemental Figure S5. 2D protein analysis of the preparation isolated from the CP47-less strains expressing His-tagged D2 protein.** The preparation was isolated using Ni affinity chromatography and analyzed by CN PAGE in the first dimension, the native gel was photographed (1D color) and scanned by LAS 4000 for fluorescence (1D fluor), after SDS-PAGE in the 2nd dimension the gel was stained by SYPRO Orange (2D SYPRO stain), Designation of complexes as in Figure 1. Note the high amount of the RCIIa/PSI(1) in the preparation. 0.5  $\mu$ g of Chl were loaded onto the gel.

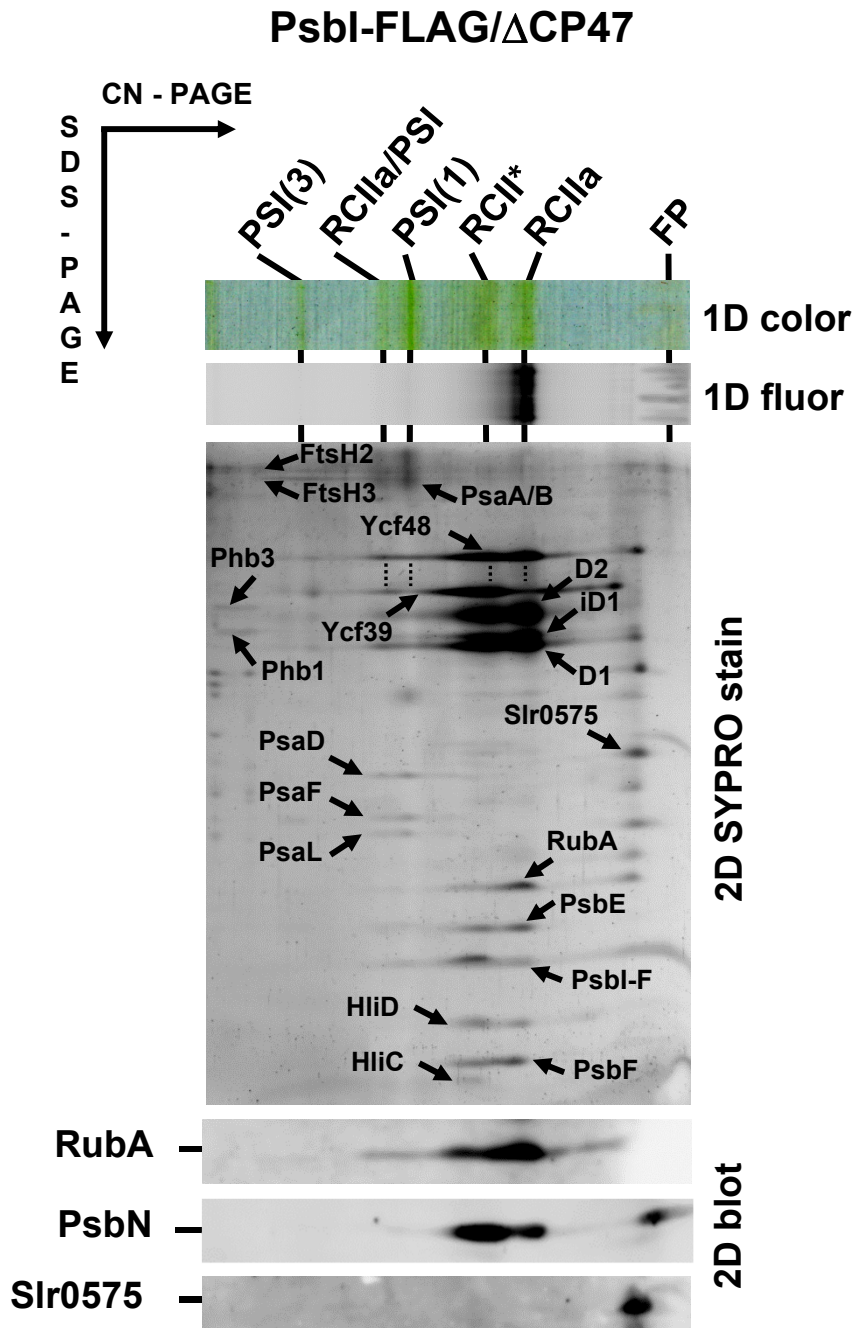

**Supplemental Figure S6. 2D protein analysis of the preparation isolated from the CP47-less strains expressing FLAG-tagged PsbI protein using FLAG-specific affinity chromatography.** The preparation was analyzed by CN PAGE in the first dimension, the native gel was photographed (1D color) and scanned by LAS 4000 for fluorescence (1D fluor), after SDS-PAGE in the 2nd dimension the gel was stained with SYPRO Orange (2D SYPRO stain) electroblotted and the blot was probed with designated antibodies. Designation of the complexes as in Figure 1. 0.8  $\mu$ g of Chl were loaded onto the gel.



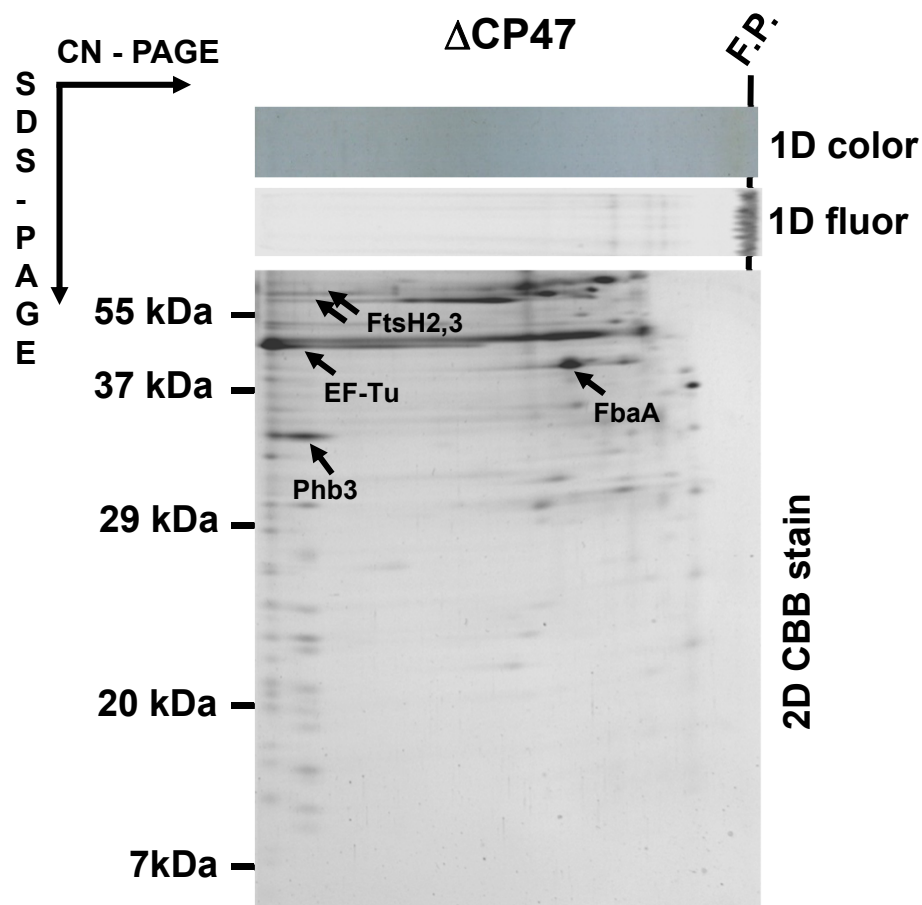

| Protein<br>UniProt<br>KB No. | Mass spectrometric analysis |                 |                                      |               | Blot<br>analysis |
|------------------------------|-----------------------------|-----------------|--------------------------------------|---------------|------------------|
|                              | Size (Da)<br>Length (AA)    | Coverage<br>(%) | Detected/theor.et no.<br>of peptides | PLGS<br>score |                  |
| <b>FbaA</b><br>Q55664        | 38972<br>359                | 29              | 8/21                                 | 691           | –                |
| <b>EFTu</b><br>P74227        | 43733<br>399                | 45              | 12/37                                | 1266          | –                |
| <b>FtsH2</b><br>Q55700       | 68496<br>627                | 16              | 8/48                                 | 390           | +                |
| <b>FtsH3</b><br>P72991       | 67250<br>616                | 21              | 8/45                                 | 384           | +                |
| <b>Phb3</b><br>P72655        | 35727<br>321                | 31              | 8/30                                 | 311           | +                |

**Supplemental Figure S7. 2D protein analysis of the control preparation isolated by Ni-affinity chromatography from the control CP47-less strains.** The preparation was analyzed by CN PAGE in the first dimension, the native gel was photographed (1D color) and scanned by LAS 4000 for fluorescence (1D fluor), after SDS-PAGE in the 2nd dimension the gel was stained by Coomassie blue (2D CBB stain). F.P. means free pigments. The main components were identified by MS (see the table), note the absence of PSII-related proteins. The amount of proteins corresponding to that in 0.5 μg of Chl of His-D2 preparation was loaded onto the gel.

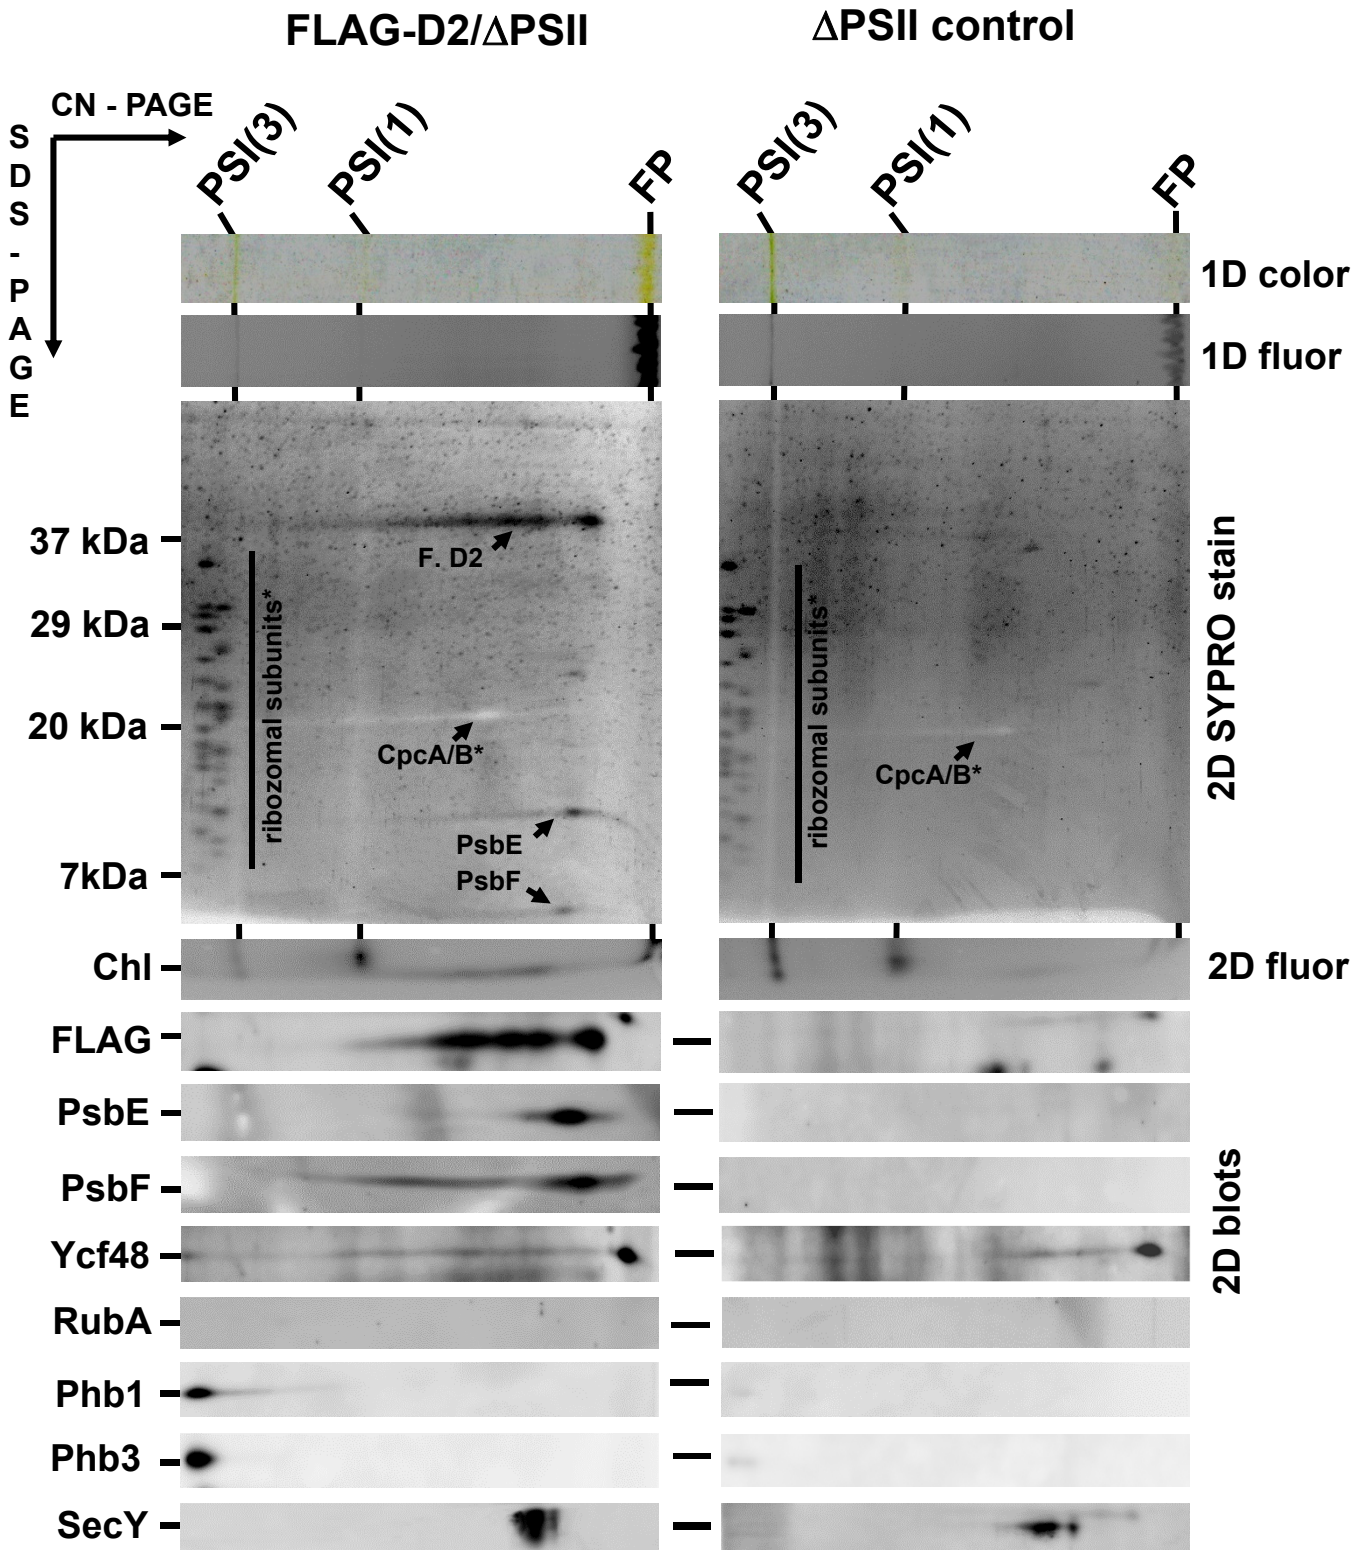

**Supplemental Figure S8. 2D protein analysis of FLAG-D2 and the control preparation.** The preparations were isolated from the control strain lacking large PSII Chl-binding proteins ( $\Delta$ PSII control) and from the strain additionally expressing FLAG-D2 (FLAG-D2/ $\Delta$ PSII). The analysis was performed by CN PAGE in the first dimension, the native gel was photographed (1D color) and scanned by LAS 4000 for fluorescence (1D fluor), after SDS-PAGE in the 2nd dimension the gel was scanned for Chl fluorescence (Chl, 2D fluor), then stained by SYPRO Orange (2D SYPRO stain) and probed with designated antibodies (2D blots). CpcA/B and ribosomes are designated with the asterisk as unspecific contaminants. Both preparations were isolated in parallel from the same amount of cells and the analysis was performed using identical volumes of the obtained preparations. The left panel is identical to the right panel in Figure 6.

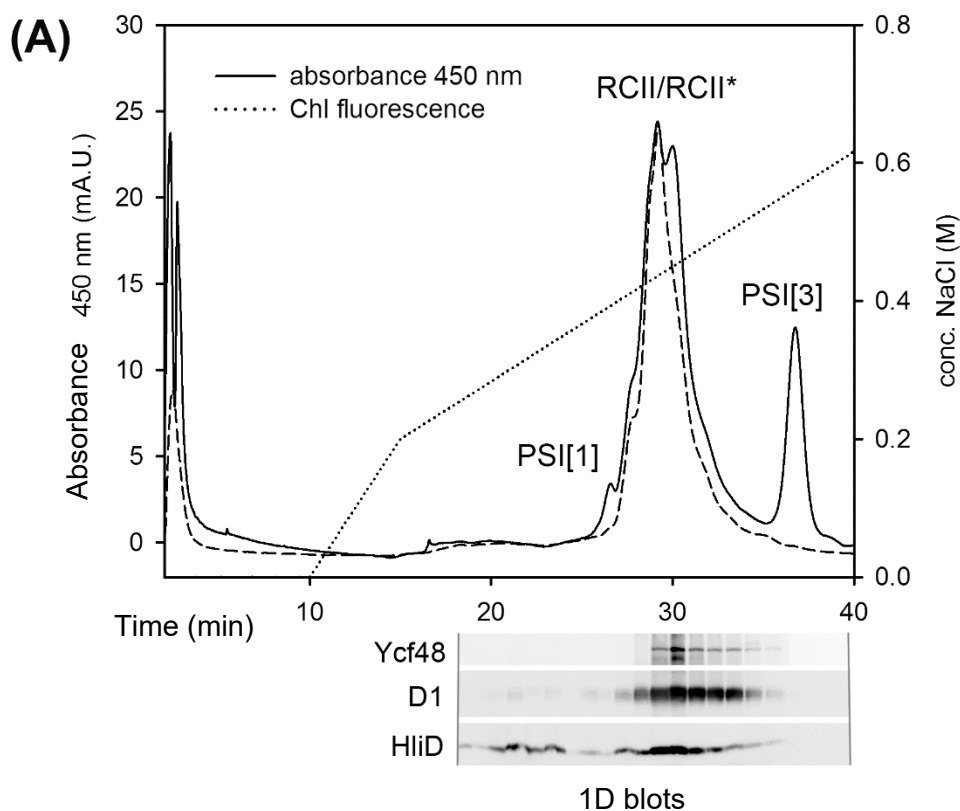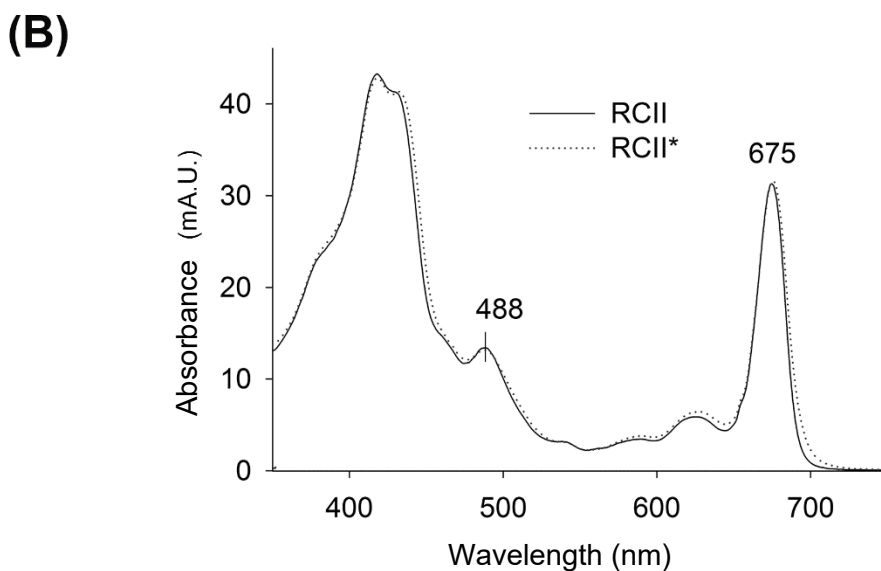

**Supplemental Figure S9. Separation of RCII complexes by ionex chromatography and their absorption spectra. A:** The His-D2 preparation isolated from the strain lacking CP47 was subjected to HPLC on the ionex MonoQ column. The separation was monitored by measurements of absorption changes at 450 nm (solid line) and fluorescence excited at 440 nm (dashed line). The chromatographic fractions collected between 18 and 40 min were analyzed using SDS-PAGE in combination with immunoblotting using antibodies specific for Ycf48, D1 and HliD. **B:** Absorption spectra measured online by diode array detector in the maxima at 28 (RCII) and 32 (RCII\*) min are shown; A.U. - absorbance units. Small blue shift of the RCII\* spectrum (dotted line) in comparison with RCII (solid line) one is most probably related to a PSI contamination.

**A**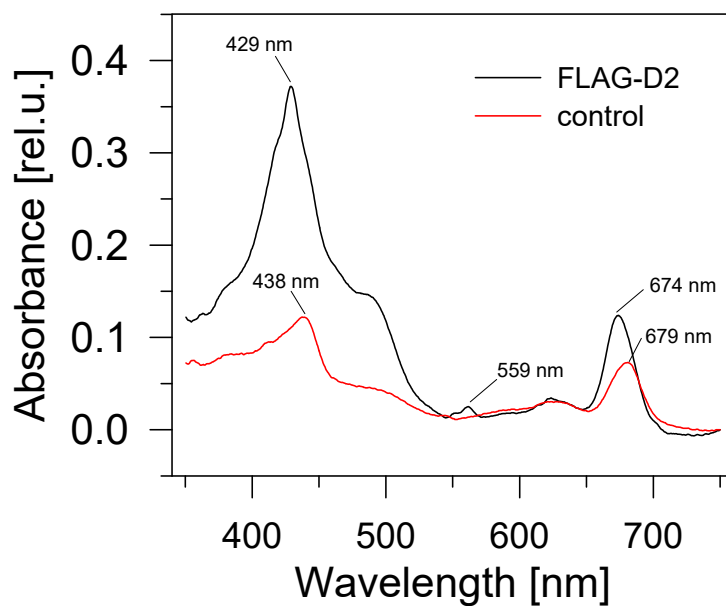**B**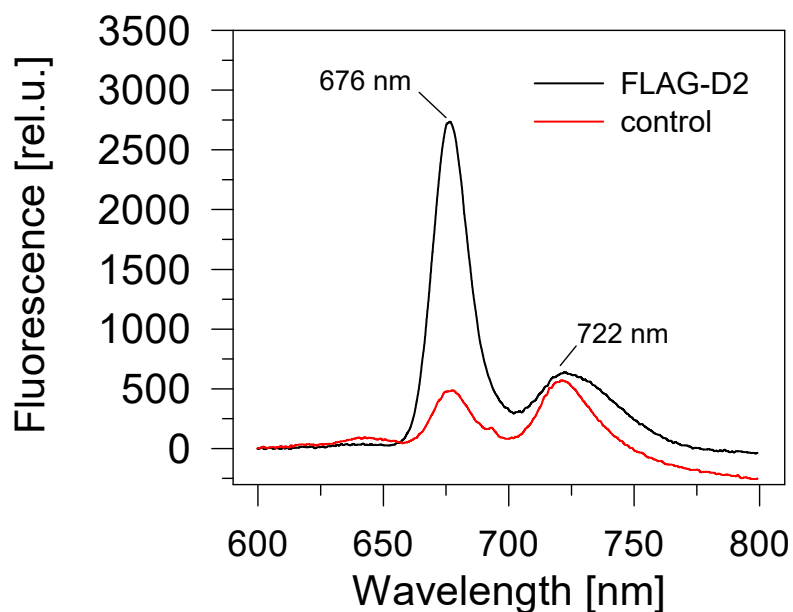

**Supplemental Fig. S10. Room temperature absorption spectra and 77K chlorophyll fluorescence spectra of the FLAG-D2 and the control FLAG-free preparations.** The preparations were isolated using FLAG affinity chromatography from the control strain lacking large PSII Chl-binding proteins (control) and from the strain additionally expressing FLAG-D2 (FLAG-D2). Both preparations were isolated in parallel from the same amount of cells and the measurements were performed using identical volumes of the obtained preparations. **A:** absorption spectra of FLAG-D2 (black line) and control (red line) were measured using Shimadzu UV3000 spectrophotometer. **B:** fluorescence spectra of of FLAG-D2 (black line) and control (red line) were measured using SM 9000 spectrophotometer (Photon Systems Instruments) at an excitation wavelength of 455 nm.

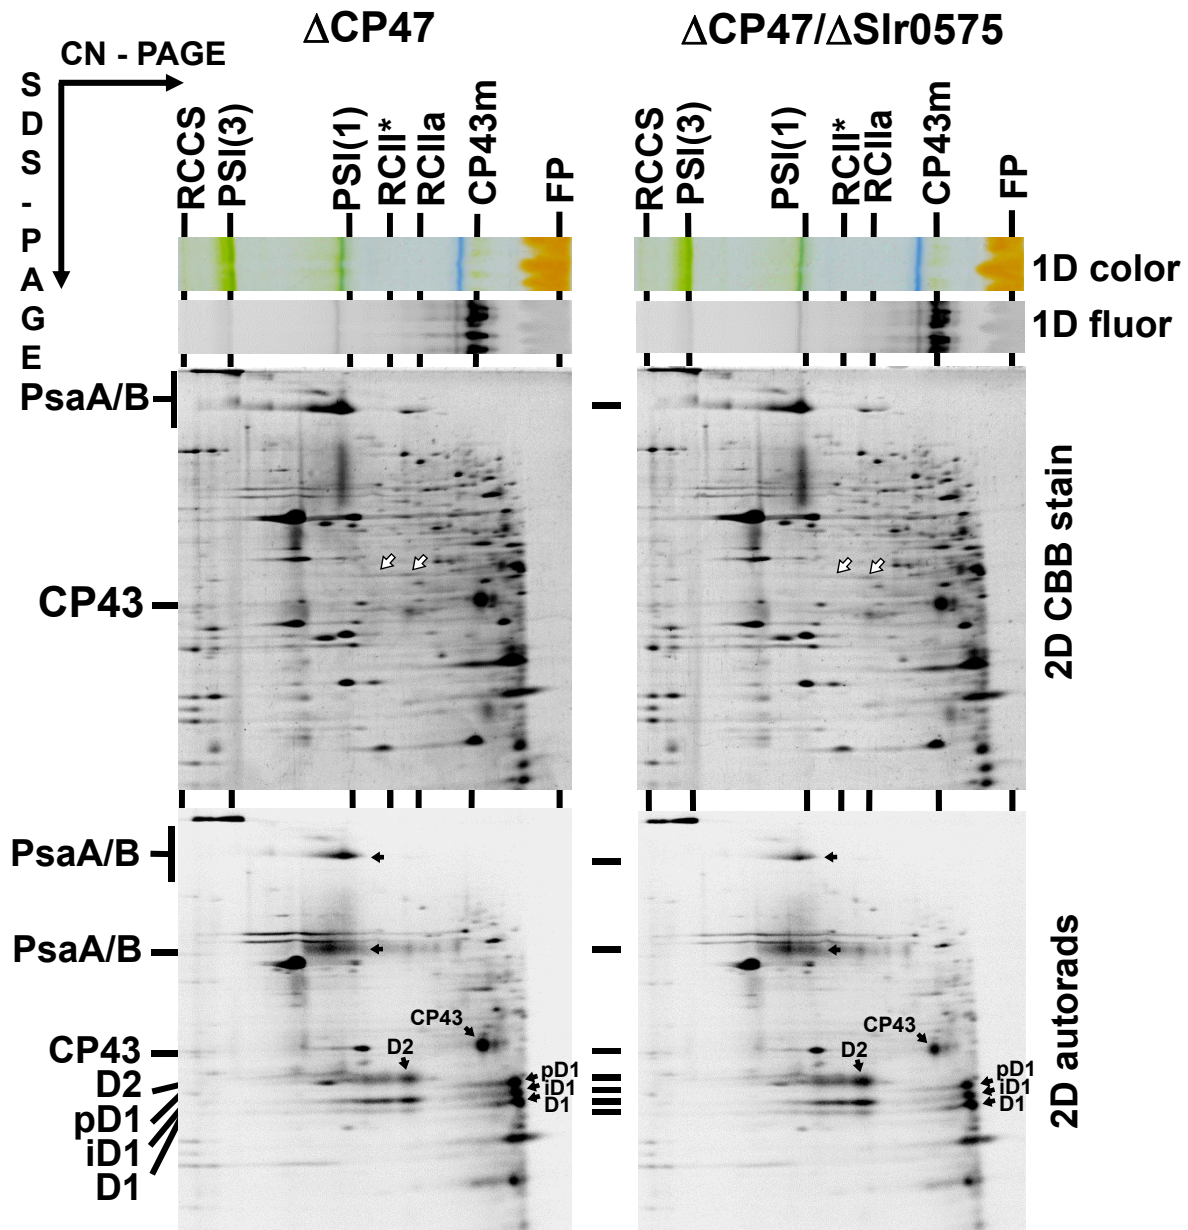

**Supplemental Figure S11. 2D protein analysis of radioactively labeled membrane proteins of  $\Delta CP47$  and  $\Delta CP47/\Delta Slr0575$  strains.** Membranes isolated from radioactively labeled cells were analysed using 2D-CN/SDS-PAGE. After the first dimension, the gel was photographed (1D colour) and scanned for Chl fluorescence (1D fluor). After separation in the second dimension, the 2D gel was stained with Coomassie Blue (2D CBB stain) and the radiolabeled proteins were subsequently detected by autoradiography (2D autorads). Designation of complexes as described in Figure S1. Empty arrows designate Ycf48 present in RCII complexes in the stained gel, closed arrows designate distinctly synthesized D2, CP43 and PSI proteins. Each loaded sample contained 3.5  $\mu$ g of Chl.

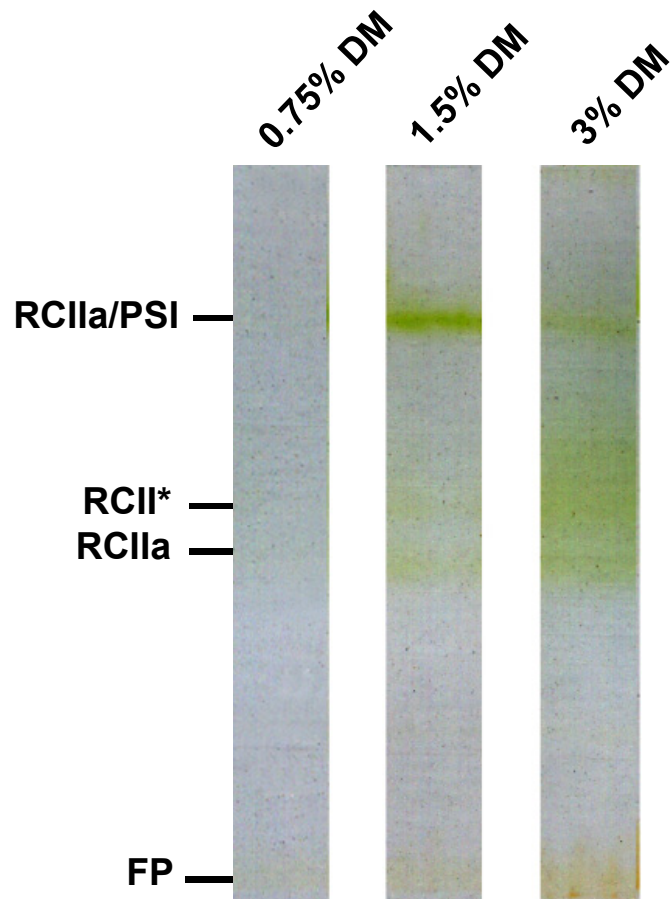

**Supplemental Figure S12. Native gel analysis of His-D2 preparations isolated from membranes of the CP47-less strain expressing His-D2 by using different concentrations of  $\beta$ -dodecyl-maltoside (DM) for solubilization.** The preparations were analyzed by CN PAGE. Designation of complexes as in Figure 1. The same volume of the samples prepared using the identical isolation procedure and identical concentration of the preparation. Concentration of Chl in membranes used for solubilization was 870  $\mu\text{g/ml}$ .

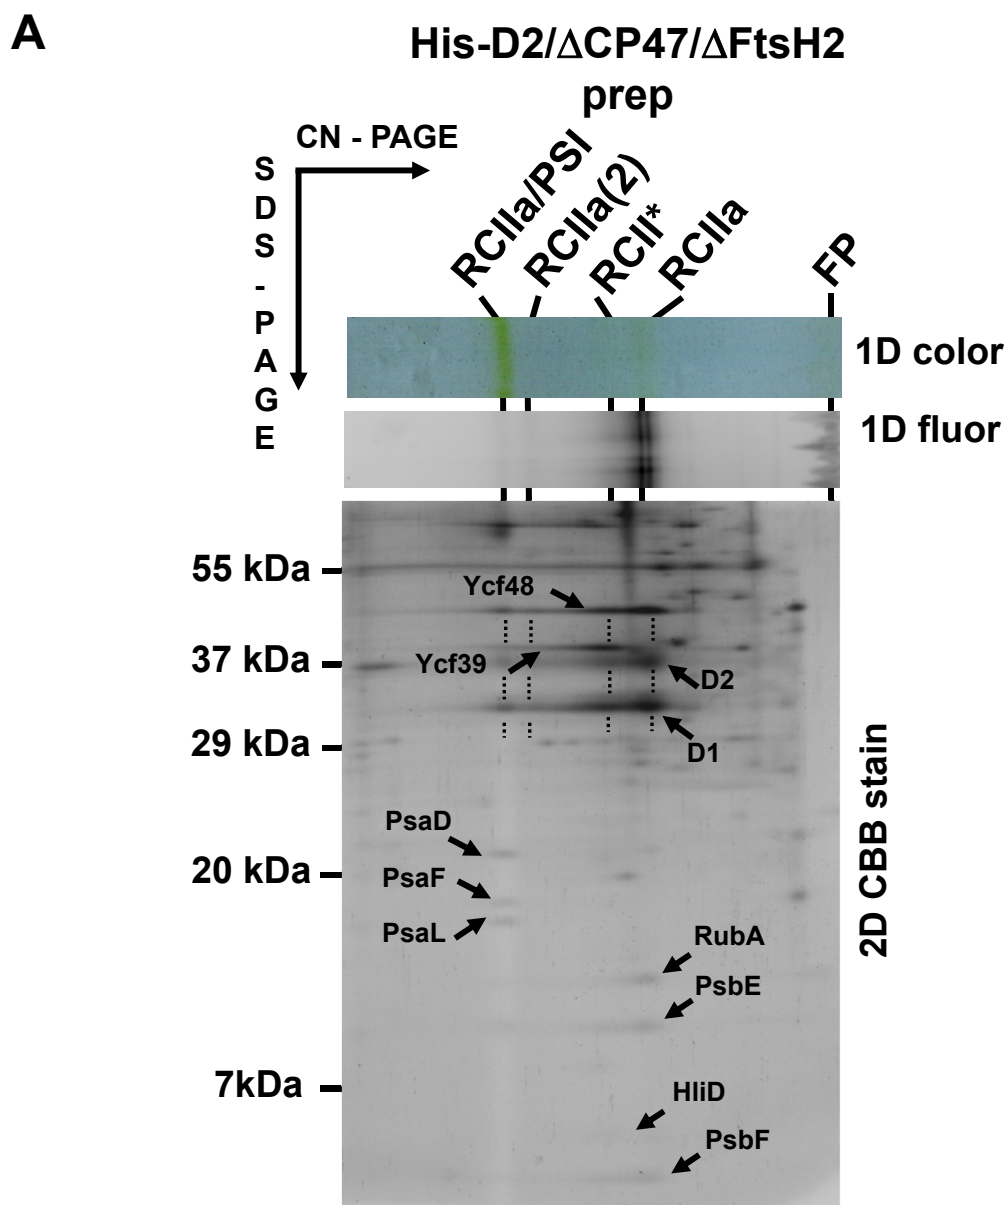

**B**

| Preparation             | Stoichiometry of pigment cofactors |               |               |                |
|-------------------------|------------------------------------|---------------|---------------|----------------|
|                         | Chl- <i>a</i>                      | b-carotene    | Pheophytin    | Heme- <i>b</i> |
| RCII*( $\Delta$ FtsH2)  | 9.2 $\pm$ 0.7                      | 2.0 $\pm$ 0.3 | 1.8 $\pm$ 0.1 | 1.0            |
| RCIIa ( $\Delta$ FtsH2) | 6.7 $\pm$ 0.6                      | 1.3 $\pm$ 0.3 | 1.8 $\pm$ 0.2 | 1.0            |

**Supplemental Figure S13. 2D protein analysis of the preparation isolated from the CP47-less strain lacking FtsH2 and expressing His-tagged D2 protein and the stoichiometry of pigment cofactors in RCII\* and RCIIa electrophoretically purified from this preparation. A:** The preparation was analyzed by CN PAGE in the first dimension, the native gel was photographed (1D color) and scanned by LAS 4000 for fluorescence (1D fluor), after SDS-PAGE in the 2nd dimension the gel was stained by Coomassie Blue (2D CBB stain). Designation of complexes as in Figure 1. 0.5  $\mu$ g of Chl were loaded onto the gel. **B:** RCII\* and RCIIa were electrophoretically purified, eluted, pigments extracted and analyzed by HPLC. The ratio of all pigments is normalized per one heme. Data are shown as mean of three independent replicates.

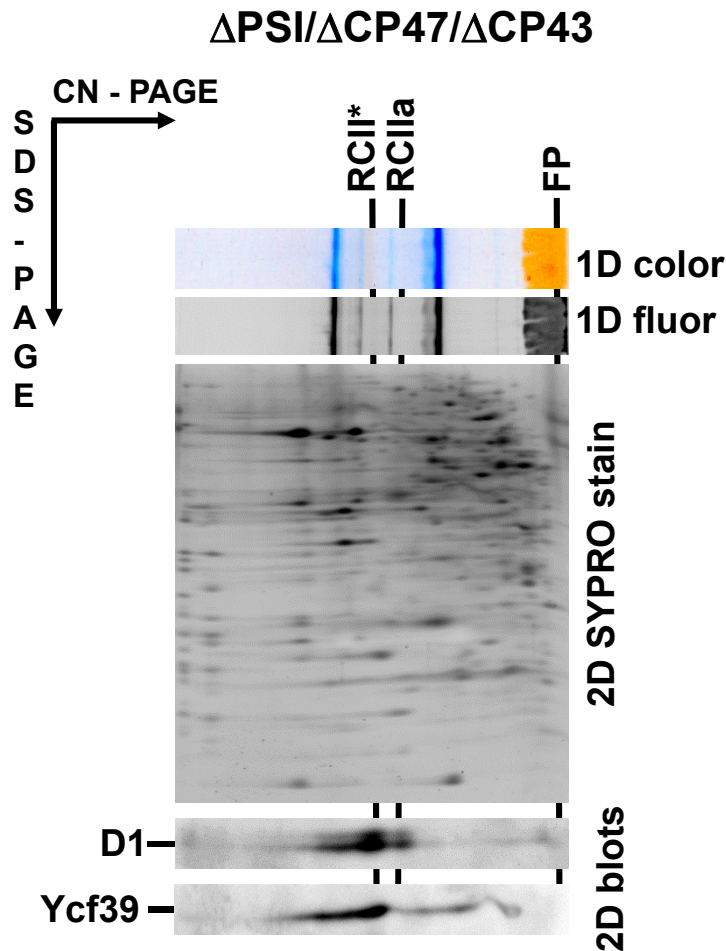

**Supplemental Figure S14. 2D protein analysis of membrane proteins of  $\Delta$ PSI/ $\Delta$ CP47/ $\Delta$ CP43 strain.** Membranes isolated from cells were analyzed using 2D-CN/SDS-PAGE. After the first dimension, the gel was photographed (1D color) and scanned for Chl fluorescence (1D fluor). After separation in the second dimension, the 2D gel was stained with SYPRO Orange (2D SYPRO stain) and probed with antibodies specific for D1 and Ycf39. 1  $\mu$ g of Chl was loaded onto the gel.



**Supplemental Table S1. List of PSII and PSI-related proteins identified by MS and Western blotting in the RCII complexes separated by 2D CN/SDS PAGE from the isolated His-D2/ $\Delta$ CP47 preparation (see Figure 1, arrows) and identification of Slr1470 in the His-D2/ $\Delta$ CP47 preparation (Supplemental Figure S3).**

| Uniprot Accession numbers | Mass spectrometric analysis |              |                          |            | Blot analysis |
|---------------------------|-----------------------------|--------------|--------------------------|------------|---------------|
|                           | Size (Da)<br>Length (AA)    | Coverage (%) | Detected no. of peptides | PLGS score |               |
| <b>Ycf39</b><br>P74429    | 36496<br>326                | 33           | 11                       | 1148       | +             |
| <b>Ycf48</b><br>P73069    | 37267<br>342                | 36           | 9                        | 928        | +             |
| <b>D2</b><br>P09192       | 39466<br>352                | 18           | 5                        | 560        | +             |
| <b>D1</b><br>P16033       | 39695<br>360                | 10           | 3                        | 303        | +             |
| <b>CyanoP</b><br>Slr1418  | 20747<br>188                | 10           | 2                        | 456        | +             |
| <b>PsbE</b><br>P09190     | 9442<br>81                  | 25           | 2                        | 134        | +             |
| <b>PsbF</b><br>P09191     | 4929<br>44                  | 38           | 1                        | 145        | +             |
| <b>PsbI</b><br>Q54697     | 4306<br>38                  | –            | –                        | –          | +             |
| <b>RubA</b><br>P73068     | 12570<br>115                | 38           | 2                        | 109        | +             |
| <b>HliD</b><br>P73563     | 6472<br>57                  | 44           | 2                        | 226        | +             |
| <b>PsaD</b><br>P19569     | 15644<br>141                | 25           | 3                        | 101        | +             |
| <b>PsaF</b><br>P29256     | 18249<br>165                | 30           | 4                        | 89         | +             |
| <b>PsaL</b><br>P37277     | 16624<br>157                | 25           | 2                        | 95         | +             |
| <b>Slr1470</b><br>P74154  | 14892<br>188                | 32           | 5                        | 400        | +             |

The analysis of protein bands was performed using a NanoAcquity UHPLC (Waters, Milford, MA, USA) on-line coupled to an ESI Q-ToF Premier mass spectrometer (Waters, Milford, MA, USA) PLGS score is calculated by Protein Lynx Global Server (PLGS 2.2.3) software (Waters, Milford, MA, USA) and is a statistical measure of peptide assignment accuracy.

**Supplemental Table S2. List of the most abundant 40 proteins identified by MS in the FLAG-Psbl/ $\Delta$ CP47 preparation.**

| Uniprot Accession numbers | Protein name                             | No of peptides | Intensity  |
|---------------------------|------------------------------------------|----------------|------------|
| P73069                    | PSII assembly factor Ycf48               | 18             | 1242200000 |
| P74429                    | PSII assembly factor Ycf39               | 17             | 605940000  |
| P09192                    | PSII protein D2                          | 6              | 521250000  |
| P16033;P07826             | PSII protein D1                          | 7              | 460220000  |
| P73952                    | PSII assembly factor CyanoP              | 7              | 149090000  |
| P09190                    | Cytochrome b559 alpha subunit            | 2              | 129110000  |
| Q55700                    | ATP-dependent zinc metalloprotease FtsH2 | 10             | 78206000   |
| P37277                    | PSI protein PsaL                         | 3              | 62678000   |
| P19569                    | PSI protein PsaD                         | 4              | 59026000   |
| P29254                    | PSI protein PsaA                         | 6              | 50275000   |
| P73068                    | Rubredoxin                               | 3              | 44167000   |
| P12975                    | PSI protein PsaE                         | 1              | 34431000   |
| P29255                    | PSI protein PsaB                         | 4              | 27994000   |
| P74720                    | SII1106                                  | 5              | 27463000   |
| P23349                    | 50S ribosomal protein L7/L12             | 3              | 25268000   |
| P72991                    | ATP-dependent zinc metalloprotease FtsH3 | 10             | 24798000   |
| P29256                    | PSI protein PsaF                         | 4              | 23745000   |
| P32422                    | PSI protein PsaC                         | 2              | 20984000   |
| Q54715                    | C-phyco cyanin alpha subunit             | 4              | 20784000   |
| P73563                    | HliC                                     | 1              | 19752000   |
| P73790                    | Pterin-4-alpha-carbinolamine dehydratase | 1              | 14659000   |
| Q54714                    | C-phyco cyanin beta subunit              | 4              | 14427000   |
| Q55584                    | Cation or drug efflux system protein     | 2              | 12120000   |
| P72655                    | Stomatin slr1128                         | 2              | 11273000   |
| P72932                    | HliD                                     | 1              | 10270000   |
| P72805                    | SII1665 protein                          | 2              | 9274200    |
| P73437                    | ATP-dependent zinc metalloprotease FtsH4 | 5              | 8696200    |
| Q6ZEP1                    | Uncharacterized protein SII5089          | 1              | 8280600    |
| P73704                    | General secretion pathway protein HofG   | 2              | 8268100    |
| P36236                    | 50S ribosomal protein L1                 | 3              | 7701300    |
| P72771                    | CemA-like protein SII1685                | 1              | 7358200    |
| Q01951                    | PSI protein PsaB                         | 2              | 6715100    |
| Q55176                    | CurT-like protein Slr0483                | 2              | 6641700    |
| P73319                    | 50S ribosomal protein L4                 | 1              | 6590400    |
| P73655                    | Tryptophan--tRNA ligase                  | 1              | 5508400    |
| P09193                    | PSII protein CP43                        | 3              | 5168000    |
| P23350                    | 50S ribosomal protein L10                | 1              | 5114800    |
| P72680                    | Tyrosine recombinase Slr0733             | 1              | 4748300    |
| P73307                    | 30S ribosomal protein S8                 | 2              | 4005500    |

The analysis of proteins precipitated from the preparation was performed using NanoElute UHPLC (Bruker) on-line coupled to a high-resolution mass spectrometer (Bruker Impact HD).

**Supplemental Table S3. List of the most abundant 40 proteins identified by MS in the FLAG-D1 preparation.**

| Uniprot Accession numbers | Protein name                              | No of peptides | Intensity |
|---------------------------|-------------------------------------------|----------------|-----------|
| P73069                    | PSII assembly factor Ycf48                | 8              | 54533000  |
| P73655                    | Tryptophan--tRNA ligase                   | 15             | 42896000  |
| Q54714                    | Phycocyanin beta subunit                  | 5              | 37597000  |
| P73713                    | Diguanylate cyclaseSII1687 protein        | 22             | 31041000  |
| P23349                    | 50S ribosomal protein L7/L12              | 4              | 27108000  |
| P16033;P07826             | PSII protein D1                           | 3              | 26748000  |
| P73842                    | Folyl-polyglutamate synthetase            | 2              | 23692000  |
| P73304                    | 30S ribosomal protein S5                  | 11             | 22235000  |
| P73317                    | 50S ribosomal protein L2                  | 10             | 19645000  |
| P74429                    | PSII assembly factor Ycf39                | 9              | 19328000  |
| P42352                    | 50S ribosomal protein L9                  | 10             | 19255000  |
| P74754                    | Slr0607 protein                           | 2              | 19231000  |
| P74229                    | 30S ribosomal protein S7                  | 8              | 18638000  |
| P73319                    | 50S ribosomal protein L4                  | 4              | 18024000  |
| P73299                    | 30S ribosomal protein S13                 | 7              | 17563000  |
| P72655                    | Stomatin slr1128                          | 7              | 17022000  |
| P74071                    | 30S ribosomal protein S2                  | 13             | 16505000  |
| P26527                    | ATP synthase beta subunit                 | 11             | 15186000  |
| Q54715                    | C-phycocyanin alpha subunit               | 4              | 14367000  |
| P73303                    | 50S ribosomal protein L15                 | 7              | 13402000  |
| P74625                    | PSI-associated linker protein CpcL        | 11             | 13379000  |
| P73312                    | 50S ribosomal protein L29                 | 7              | 12825000  |
| P74227                    | Elongation factor Tu                      | 5              | 11562000  |
| P19569                    | PSI protein PsaD                          | 8              | 10917000  |
| P36236                    | 50S ribosomal protein L1                  | 6              | 10619000  |
| P73145                    | DNA-binding protein Slr1034               | 3              | 10453000  |
| P72851                    | 50S ribosomal protein L28                 | 5              | 10354000  |
| P37277                    | PSI protein PsaL                          | 4              | 10242000  |
| P74386                    | Urease beta subunit                       | 4              | 10170000  |
| P72659                    | Polyribonucleotide nucleotidyltransferase | 10             | 9934600   |
| P48944                    | 30S ribosomal protein S14                 | 6              | 9892500   |
| Q55499                    | Single-stranded DNA-binding protein 1     | 9              | 9727800   |
| P27179                    | ATP synthase alpha subunit                | 7              | 8980900   |
| P77965                    | RNA polymerase subunit beta               | 10             | 8821900   |
| Q01951;P74551             | Allophycocyanin alpha subunit             | 6              | 8239100   |
| P73530                    | 30S ribosomal protein S1                  | 5              | 8025800   |
| P29256                    | PSI protein PsaF                          | 5              | 8023300   |
| P29254                    | PSI protein PsaA                          | 7              | 7671400   |
| P73314                    | 30S ribosomal protein S3                  | 3              | 7613900   |

The analysis of proteins precipitated from the preparation was performed using NanoElute UHPLC (Bruker) on-line coupled to a high-resolution mass spectrometer (Bruker Impact HD).

**Supplemental Table S4. List of the most abundant 40 proteins identified by MS in the FLAG-D2 preparation.**

| Uniprot Accession numbers | Protein name                             | No of peptides | Intensity |
|---------------------------|------------------------------------------|----------------|-----------|
| P09192                    | PSII protein D2                          | 5              | 333020000 |
| P09190                    | PSII cytochrome b559 subunit alpha       | 2              | 183180000 |
| P36236                    | 50S ribosomal protein L1                 | 11             | 69920000  |
| P23349                    | 50S ribosomal protein L7/L12             | 5              | 68215000  |
| P73308                    | 50S ribosomal protein L5                 | 9              | 52804000  |
| P73299                    | 30S ribosomal protein S13                | 6              | 51161000  |
| P48946                    | 30S ribosomal protein S18                | 5              | 48213000  |
| P73307                    | 30S ribosomal protein S8                 | 5              | 47533000  |
| P73319                    | 50S ribosomal protein L4                 | 4              | 45939000  |
| P73317                    | 50S ribosomal protein L2                 | 8              | 45912000  |
| P73298                    | 30S ribosomal protein S11                | 7              | 44900000  |
| P73306                    | 50S ribosomal protein L6                 | 8              | 39285000  |
| Q54715                    | C-phycoerythrin alpha subunit            | 5              | 38334000  |
| P42352                    | 50S ribosomal protein L9                 | 7              | 37343000  |
| P73305                    | 50S ribosomal protein L18                | 3              | 36912000  |
| P72866                    | 30S ribosomal protein S15                | 3              | 33229000  |
| P74267                    | 50S ribosomal protein L27                | 3              | 30195000  |
| P74229                    | 30S ribosomal protein S7                 | 5              | 30186000  |
| P73676                    | PSII protein PsbY                        | 1              | 27901000  |
| P73311                    | 30S ribosomal protein S17                | 3              | 24534000  |
| P74410                    | 30S ribosomal protein S16                | 4              | 24275000  |
| P73530                    | 30S ribosomal protein S1 h               | 7              | 23419000  |
| P73636                    | 30S ribosomal protein S6                 | 4              | 20741000  |
| P73320                    | 50S ribosomal protein L3                 | 3              | 20686000  |
| P74230                    | 30S ribosomal protein S12                | 5              | 19824000  |
| P72851                    | 50S ribosomal protein L28                | 4              | 18770000  |
| P73304                    | 30S ribosomal protein S5                 | 3              | 18066000  |
| P74227                    | Elongation factor Tu                     | 7              | 16956000  |
| Q54714                    | C-phycoerythrin beta subunit             | 4              | 16935000  |
| P74518                    | Ribosome hibernation promotion factor    | 2              | 16056000  |
| P73312                    | 50S ribosomal protein L29                | 2              | 15798000  |
| P80505                    | Glyceraldehyde-3-phosphate dehydrogenase | 5              | 13881000  |
| P23350                    | 50S ribosomal protein L10                | 1              | 13172000  |
| P37101                    | Phosphoribulokinase                      | 4              | 11821000  |
| P48959                    | 50S ribosomal protein L35                | 5              | 11341000  |
| P73313                    | 50S ribosomal protein L16                | 3              | 9212000   |
| P73314                    | 30S ribosomal protein S3                 | 3              | 8960200   |
| P48949                    | 30S ribosomal protein S21                | 2              | 8592000   |
| P73655                    | Tryptophan--tRNA ligase                  | 4              | 8216900   |

The analysis of proteins precipitated from the preparation was performed using NanoElute UHPLC (Bruker) on-line coupled to a high-resolution mass spectrometer (Bruker Impact HD).

**Supplemental Table S5. List of primers.** Hexa-*his* tag underlined, EcoRV site in lower case.

| Primers     | Sequences (5'-3')                                                             |
|-------------|-------------------------------------------------------------------------------|
| psbDC1F     | AGTTGCGACAAAATAACCCAGCTCCAGCAA                                                |
| psbD-His-2R | GCGCGTCCGACTGCAATAGTATGATGATGATGATGATGCATAAAT<br>GCAAATCCTCTTGCGTAGCT         |
| psbD-His-3F | AGCTACGCAAGAGGATTTGCATTTATG <u>CATCATCATCATCATCAT</u><br>ACTATTGCAGTCGGACGCGC |
| psbDC4R     | TTGCCAAAGTATTCTCCTGATTTAAATGATATTGAGCA                                        |
| slr0906-1F  | TTTTCAATTTGTTGTCCCTGGACCGGTAGACAGTA                                           |
| slr0906-2R  | AAGCTGTGGTTAAAAGCTGTGCAAGAAGCACgatatcTGACGCTCC<br>TTCTAGTAACGAATAGTGTT        |
| slr0906-3F  | AACACTATTCGTTACTAGAAGGAGCGTCAgatatcGTGCTTCTTGCA<br>CAGCTTTTAACCACAGCTT        |
| slr0906-4R  | TGTCAATAGCTCATCTGAGTTGGGAAAAAGCCT                                             |
| psbDC1F     | AGTTGCGACAAAATAACCCAGCTCCAGCAA                                                |
